# Supplementary material for: Integrative Bulk and Single-Cell Profiling of Premanufacture T-cell Populations Reveals Factors Mediating Long-Term Persistence of CAR T-cell Therapy
Source: Oxford University Press journal article supplement (doi:10.1158/2159-8290.cd-20-1677), 2021-04-05
Supplement: 21598290cd201677-sup-255669_2_supp_7024530_qqhph2.xlsx [file 21598290cd201677-sup-255669_2_supp_7024530_qqhph2.xlsx]

## Sheet: TCF7_Regulon
ensembl_gene_id_version	entrezgene	hgnc_symbol
ENSG00000081059.19	6932	TCF7
ENSG00000104964.14	166	AES
ENSG00000175727.13	22877	MLXIP
ENSG00000160310.17	3275	PRMT2
ENSG00000100105.17	23598	PATZ1
ENSG00000179862.6	163732	CITED4
ENSG00000182568.16	6304	SATB1
ENSG00000171703.16	6919	TCEA2
ENSG00000133250.13	84330	ZNF414
ENSG00000140577.15	64784	CRTC3
ENSG00000074966.10	7294	TXK
ENSG00000136997.17	4609	MYC
ENSG00000114861.20	27086	FOXP1
ENSG00000106624.10	165	AEBP1
ENSG00000237765.6	285550	FAM200B
ENSG00000186918.13	55893	ZNF395
ENSG00000132382.14	10514	MYBBP1A
ENSG00000166888.11	6778	STAT6
ENSG00000061273.17	51564	HDAC7
ENSG00000149016.15	64852	TUT1
ENSG00000148337.20	25792	CIZ1
ENSG00000136717.14	274	BIN1
ENSG00000181896.11	94039	ZNF101
ENSG00000133895.14	4221	MEN1
ENSG00000100823.11	328	APEX1
ENSG00000162714.12	84838	ZNF496
ENSG00000065717.14	7089	TLE2
ENSG00000189046.10	121642	ALKBH2
ENSG00000197111.15	5094	PCBP2
ENSG00000167685.14	55311	ZNF444
ENSG00000168286.2	57215	THAP11
ENSG00000150907.7	2308	FOXO1
ENSG00000180357.9	23060	ZNF609
ENSG00000205903.6	100131017	ZNF316
ENSG00000214717.11	9189	ZBED1
ENSG00000275023.4	4302	MLLT6
ENSG00000119772.16	1788	DNMT3A
ENSG00000130726.11	10155	TRIM28
ENSG00000148303.16	6130	RPL7A
ENSG00000185811.18	10320	IKZF1
ENSG00000103510.19	84148	KAT8
ENSG00000126351.12	7067	THRA
ENSG00000122085.16	130916	MTERF4
ENSG00000185187.12	59307	SIGIRR
ENSG00000214022.11	29803	REPIN1
ENSG00000221983.7	7311	UBA52
ENSG00000175467.14	9092	SART1
ENSG00000198286.9	84433	CARD11
ENSG00000112033.13	5467	PPARD
ENSG00000125952.18	4149	MAX
ENSG00000172292.14	253782	CERS6
ENSG00000088888.17	57506	MAVS
ENSG00000148450.12	22921	MSRB2
ENSG00000146285.13	256380	SCML4
ENSG00000171720.9	8841	HDAC3
ENSG00000127528.5	10365	KLF2
ENSG00000108773.10	2648	KAT2A
ENSG00000147140.15	4841	NONO
ENSG00000121413.12	65982	ZSCAN18
ENSG00000147604.13	6129	RPL7
ENSG00000175221.14	10025	MED16
ENSG00000170322.14	4798	NFRKB
ENSG00000103199.13	26048	ZNF500
ENSG00000141867.17	23476	BRD4
ENSG00000159692.15	1487	CTBP1
ENSG00000105698.15	7392	USF2
ENSG00000152475.6	116412	ZNF837
ENSG00000103197.17	7249	TSC2
ENSG00000108312.14	7343	UBTF
ENSG00000105516.10	1628	DBP
ENSG00000122034.14	2971	GTF3A
ENSG00000070476.14	79364	ZXDC
ENSG00000172534.13	3054	HCFC1
ENSG00000163516.13	55139	ANKZF1
ENSG00000087157.18	9489	PGS1
ENSG00000108509.20	23125	CAMTA2
ENSG00000171316.11	55636	CHD7
ENSG00000131196.17	4772	NFATC1
ENSG00000116584.17	9181	ARHGEF2
ENSG00000170581.13	6773	STAT2
ENSG00000141480.17	409	ARRB2
ENSG00000118263.14	8609	KLF7
ENSG00000169564.6	5093	PCBP1
ENSG00000115207.13	2976	GTF3C2
ENSG00000141384.12	6875	TAF4B
ENSG00000188868.13	147837	ZNF563
ENSG00000155506.16	23367	LARP1
ENSG00000177030.16	10522	DEAF1
ENSG00000141258.12	9905	SGSM2
ENSG00000125520.13	56731	SLC2A4RG
ENSG00000071564.14	6929	TCF3
ENSG00000180884.9	126375	ZNF792
ENSG00000118707.9	60436	TGIF2
ENSG00000135486.17	3178	HNRNPA1
ENSG00000099821.13	5442	POLRMT
ENSG00000152518.7	678	ZFP36L2
ENSG00000170004.16	1107	CHD3
ENSG00000204227.4	6015	RING1
ENSG00000103495.13	4150	MAZ
ENSG00000102882.11	5595	MAPK3
ENSG00000204514.9	730051	ZNF814
ENSG00000160633.12	6294	SAFB
ENSG00000263001.5	2969	GTF2I
ENSG00000179456.10	10472	ZBTB18
ENSG00000170485.16	4862	NPAS2
ENSG00000174282.11	57659	ZBTB4
ENSG00000141298.18	85464	SSH2
ENSG00000137309.19	3159	HMGA1
ENSG00000204713.10	5987	TRIM27
ENSG00000126561.16	6776	STAT5A
ENSG00000099326.8	7593	MZF1
ENSG00000105939.12	56829	ZC3HAV1
ENSG00000102245.7	959	CD40LG
ENSG00000167393.17	28227	PPP2R3B
ENSG00000130816.15	1786	DNMT1
ENSG00000160094.14	149076	ZNF362
ENSG00000213015.8	51157	ZNF580
ENSG00000184897.5	8971	H1FX
ENSG00000137193.13	5292	PIM1
ENSG00000090447.11	7023	TFAP4
ENSG00000065970.8	55810	FOXJ2
ENSG00000243943.9	84450	ZNF512
ENSG00000159388.5	7832	BTG2
ENSG00000100429.17	83933	HDAC10
ENSG00000132846.5	84327	ZBED3
ENSG00000160710.16	103	ADAR
ENSG00000105287.12	25865	PRKD2
ENSG00000053254.15	1112	FOXN3
ENSG00000129911.8	83855	KLF16
ENSG00000141510.17	7157	TP53
ENSG00000185345.20	5071	PRKN
ENSG00000176472.10	284346	ZNF575
ENSG00000173757.9	6777	STAT5B
ENSG00000138668.18	3184	HNRNPD
ENSG00000119403.14	26147	PHF19
ENSG00000126767.17	2002	ELK1
ENSG00000072310.16	6720	SREBF1
ENSG00000104907.12	55621	TRMT1
ENSG00000213689.13	11277	TREX1
ENSG00000185122.10	3297	HSF1
ENSG00000088038.18	4849	CNOT3
ENSG00000198816.6	140467	ZNF358
ENSG00000185252.18	7625	ZNF74
ENSG00000079432.7	23152	CIC
ENSG00000110395.6	867	CBL
ENSG00000182979.17	9112	MTA1
ENSG00000135144.7	1840	DTX1
ENSG00000234616.8	8629	JRK
ENSG00000109787.12	51274	KLF3
ENSG00000106785.14	9830	TRIM14
ENSG00000105699.16	51599	LSR
ENSG00000181638.17	286128	ZFP41
ENSG00000171425.9	51545	ZNF581
ENSG00000196588.15	57591	MRTFA
ENSG00000183570.16	54039	PCBP3
ENSG00000163328.13	151556	GPR155
ENSG00000141905.18	4782	NFIC
ENSG00000164048.13	51385	ZNF589
ENSG00000004487.16	23028	KDM1A
ENSG00000155508.13	9337	CNOT8
ENSG00000204946.9	100289678	ZNF783
ENSG00000106261.16	7586	ZKSCAN1
ENSG00000141968.7	7409	VAV1
ENSG00000107882.11	51684	SUFU
ENSG00000064393.15	28996	HIPK2
ENSG00000172819.16	5916	RARG
ENSG00000166925.8	81628	TSC22D4
ENSG00000101493.10	9658	ZNF516
ENSG00000144802.11	64332	NFKBIZ
ENSG00000028277.21	5452	POU2F2
ENSG00000107404.19	1855	DVL1
ENSG00000157216.15	23648	SSBP3
ENSG00000108557.18	10743	RAI1
ENSG00000198690.9	22909	FAN1
ENSG00000179833.4	9792	SERTAD2
ENSG00000267508.5	26974	ZNF285
ENSG00000165185.14	158405	KIAA1958
ENSG00000119574.12	84878	ZBTB45
ENSG00000197928.10	342926	ZNF677
ENSG00000103423.13	9093	DNAJA3
ENSG00000166169.16	27343	POLL
ENSG00000203485.12	64423	INF2
ENSG00000174306.21	23051	ZHX3
ENSG00000176293.19	7694	ZNF135
ENSG00000165804.15	51222	ZNF219
ENSG00000005102.12	4222	MEOX1
ENSG00000171291.8	90594	ZNF439
ENSG00000165684.4	6621	SNAPC4
ENSG00000163013.11	150726	FBXO41
ENSG00000144218.18	3899	AFF3
ENSG00000100403.11	23264	ZC3H7B
ENSG00000179943.7	84922	FIZ1
ENSG00000174586.10	162968	ZNF497
ENSG00000113108.19	10307	APBB3
ENSG00000227124.9	100131827	ZNF717
ENSG00000105662.15	23373	CRTC1
ENSG00000181444.12	168544	ZNF467
ENSG00000142599.17	473	RERE
ENSG00000134250.19	4853	NOTCH2
ENSG00000186020.12	57711	ZNF529
ENSG00000167632.15	83696	TRAPPC9
ENSG00000090470.14	10081	PDCD7
ENSG00000089775.11	7597	ZBTB25
ENSG00000188707.5	113763	ZBED6CL
ENSG00000189144.13	126231	ZNF573
ENSG00000178386.12	7766	ZNF223
ENSG00000221944.7	200765	TIGD1
ENSG00000119401.10	22954	TRIM32
ENSG00000149136.8	6749	SSRP1
ENSG00000103037.11	79918	SETD6
ENSG00000020256.19	55734	ZFP64
ENSG00000185730.7	79943	ZNF696
ENSG00000095066.11	29911	HOOK2
ENSG00000204519.10	90233	ZNF551
ENSG00000258405.9	147660	ZNF578
ENSG00000185650.9	677	ZFP36L1
ENSG00000165821.11	6297	SALL2
ENSG00000127903.13	90485	ZNF835
ENSG00000179981.10	10194	TSHZ1
ENSG00000179909.15	7710	ZNF154
ENSG00000178935.5	79818	ZNF552
ENSG00000158813.17	1896	EDA
ENSG00000198105.13	57209	ZNF248
ENSG00000171649.11	284307	ZIK1
ENSG00000221866.9	91584	PLXNA4
ENSG00000161298.17	84911	ZNF382
ENSG00000197162.9	146540	ZNF785
ENSG00000166704.11	80095	ZNF606
ENSG00000155846.16	133522	PPARGC1B
ENSG00000179627.9	100128927	ZBTB42
ENSG00000198182.12	84775	ZNF607
ENSG00000198169.8	90987	ZNF251
ENSG00000142409.5	126208	ZNF787
ENSG00000197363.9	340385	ZNF517
ENSG00000171467.15	24149	ZNF318
ENSG00000160113.5	2063	NR2F6
ENSG00000196724.12	147686	ZNF418
ENSG00000167528.12	121274	ZNF641
ENSG00000112592.13	6908	TBP
ENSG00000176160.10	124535	HSF5
ENSG00000050327.14	7984	ARHGEF5
ENSG00000008441.16	4784	NFIX
ENSG00000186260.16	57496	MRTFB
ENSG00000197937.12	84671	ZNF347
ENSG00000091831.23	2099	ESR1
ENSG00000100324.13	10454	TAB1
ENSG00000022976.15	55778	ZNF839
ENSG00000116871.15	55700	MAP7D1
ENSG00000139651.10	283337	ZNF740
ENSG00000196381.10	163115	ZNF781
ENSG00000137497.17	4926	NUMA1
ENSG00000089351.14	57655	GRAMD1A
ENSG00000175220.11	392	ARHGAP1
ENSG00000175115.11	55690	PACS1
ENSG00000171608.15	5293	PIK3CD
ENSG00000196313.11	9883	POM121
ENSG00000162430.16	57190	SELENON
ENSG00000129353.14	57153	SLC44A2
ENSG00000005206.16	56928	SPPL2B
ENSG00000157978.11	26119	LDLRAP1
ENSG00000159753.13	146206	CARMIL2
ENSG00000220201.7	100125288	ZGLP1
ENSG00000188227.12	390927	ZNF793
ENSG00000186815.12	53373	TPCN1
ENSG00000185989.10	22821	RASA3
ENSG00000177425.10	5074	PAWR
ENSG00000171130.18	155066	ATP6V0E2
ENSG00000127084.18	89846	FGD3
ENSG00000198858.9	91300	R3HDM4
ENSG00000180448.10	23526	ARHGAP45
ENSG00000132182.11	23225	NUP210
ENSG00000160445.10	10444	ZER1
ENSG00000101298.14	9751	SNPH
ENSG00000073849.14	6480	ST6GAL1
ENSG00000275342.4	157285	PRAG1
ENSG00000215790.7	9906	SLC35E2A
ENSG00000167106.11	399665	FAM102A
ENSG00000177663.13	23765	IL17RA
ENSG00000196187.11	9725	TMEM63A
ENSG00000125648.14	79085	SLC25A23
ENSG00000124181.14	5335	PLCG1
ENSG00000115756.12	3241	HPCAL1
ENSG00000168488.18	11273	ATXN2L
ENSG00000108469.14	9400	RECQL5
ENSG00000093072.16	51816	ADA2
ENSG00000021300.13	58473	PLEKHB1
ENSG00000181523.12	6448	SGSH
ENSG00000172349.17	3603	IL16
ENSG00000166341.7	8642	DCHS1
ENSG00000100060.17	4242	MFNG
ENSG00000065357.19	1606	DGKA
ENSG00000053918.16	3784	KCNQ1
ENSG00000161999.11	339123	JMJD8
ENSG00000139641.12	23344	ESYT1
ENSG00000133985.2	23508	TTC9
ENSG00000122359.17	311	ANXA11
ENSG00000114812.12	7433	VIPR1
ENSG00000108219.14	81619	TSPAN14
ENSG00000068120.14	80347	COASY
ENSG00000008513.15	6482	ST3GAL1
ENSG00000198055.10	2870	GRK6
ENSG00000091409.14	3655	ITGA6
ENSG00000064666.14	1265	CNN2
ENSG00000266094.7	83593	RASSF5
ENSG00000213203.2	170575	GIMAP1
ENSG00000185361.8	126282	TNFAIP8L1
ENSG00000175567.8	7351	UCP2
ENSG00000154102.10	404550	C16orf74
ENSG00000139193.3	939	CD27
ENSG00000089154.10	10985	GCN1
ENSG00000084774.13	790	CAD
ENSG00000072110.13	87	ACTN1
ENSG00000184384.13	84441	MAML2
ENSG00000170915.8	85315	PAQR8
ENSG00000149582.15	84866	TMEM25
ENSG00000122378.13	84293	PRXL2A
ENSG00000184640.17	10801	SEPT9
ENSG00000181754.6	57463	AMIGO1
ENSG00000167930.15	83986	FAM234A
ENSG00000167566.16	57701	NCKAP5L
ENSG00000162729.13	93185	IGSF8
ENSG00000157870.15	127281	PRXL2B
ENSG00000185085.2	80789	INTS5
ENSG00000176994.10	140775	SMCR8
ENSG00000114650.19	22937	SCAP
ENSG00000072958.8	8907	AP1M1
ENSG00000070413.19	9993	DGCR2
ENSG00000231925.11	6892	TAPBP
ENSG00000139636.15	55716	LMBR1L
ENSG00000106263.17	8662	EIF3B
ENSG00000104805.15	4924	NUCB1
ENSG00000178209.15	5339	PLEC
ENSG00000177666.16	57104	PNPLA2
ENSG00000169180.11	23214	XPO6
ENSG00000166313.18	322	APBB1
ENSG00000162591.15	1953	MEGF6
ENSG00000135960.9	10913	EDAR
ENSG00000107816.17	84445	LZTS2
ENSG00000089060.11	80024	SLC8B1
ENSG00000197093.10	79690	GAL3ST4
ENSG00000178802.17	4351	MPI
ENSG00000175215.10	10106	CTDSP2
ENSG00000173114.12	54674	LRRN3
ENSG00000162894.11	9214	FCMR
ENSG00000157837.15	121665	SPPL3
ENSG00000157350.12	6483	ST3GAL2
ENSG00000011304.19	5725	PTBP1
ENSG00000184613.10	4753	NELL2
ENSG00000169242.11	1942	EFNA1
ENSG00000154027.18	26289	AK5
ENSG00000142303.13	81794	ADAMTS10
ENSG00000103148.15	8131	NPRL3
ENSG00000099995.18	10291	SF3A1
ENSG00000099308.10	23031	MAST3
ENSG00000080189.14	51006	SLC35C2
ENSG00000188322.4	388228	SBK1
ENSG00000178921.13	5198	PFAS
ENSG00000177383.4	64110	MAGEF1
ENSG00000162777.16	79961	DENND2D
ENSG00000143772.9	3707	ITPKB
ENSG00000134193.14	83998	REG4
ENSG00000108679.12	3959	LGALS3BP
ENSG00000100242.15	25777	SUN2
ENSG00000213654.9	63940	GPSM3
ENSG00000205356.9	25851	TECPR1
ENSG00000188191.14	5575	PRKAR1B
ENSG00000178252.17	11180	WDR6
ENSG00000174807.3	57124	CD248
ENSG00000171456.18	171023	ASXL1
ENSG00000162892.15	11009	IL24
ENSG00000161558.10	55260	TMEM143
ENSG00000144711.15	9922	IQSEC1
ENSG00000136732.15	2995	GYPC
ENSG00000131067.16	2686	GGT7
ENSG00000130475.14	23149	FCHO1
ENSG00000111752.10	1911	PHC1
ENSG00000107021.15	54662	TBC1D13
ENSG00000104894.11	951	CD37
ENSG00000103932.11	26015	RPAP1
ENSG00000103222.18	4363	ABCC1
ENSG00000100359.20	27352	SGSM3
ENSG00000100241.20	6305	SBF1
ENSG00000077454.15	4034	LRCH4
ENSG00000278195.1	6753	SSTR3
ENSG00000198909.7	4215	MAP3K3
ENSG00000183020.13	161	AP2A2
ENSG00000179409.10	50628	GEMIN4
ENSG00000160191.17	5152	PDE9A
ENSG00000147457.13	91782	CHMP7
ENSG00000136490.8	80774	LIMD2
ENSG00000101224.17	994	CDC25B
ENSG00000241973.10	5297	PI4KA
ENSG00000174292.12	8711	TNK1
ENSG00000173065.13	55731	FAM222B
ENSG00000168056.15	4054	LTBP3
ENSG00000167792.12	4723	NDUFV1
ENSG00000156515.23	3098	HK1
ENSG00000154016.13	10750	GRAP
ENSG00000137076.20	7094	TLN1
ENSG00000109107.13	230	ALDOC
ENSG00000105647.16	5296	PIK3R2
ENSG00000103653.16	1445	CSK
ENSG00000103064.14	9057	SLC7A6
ENSG00000090863.11	2734	GLG1
ENSG00000049239.12	9563	H6PD
ENSG00000158106.13	114822	RHPN1
ENSG00000128340.14	5880	RAC2
ENSG00000126882.12	286336	FAM78A
ENSG00000120915.13	2053	EPHX2
ENSG00000116128.10	607	BCL9
ENSG00000110881.11	41	ASIC1
ENSG00000105063.18	22870	PPP6R1
ENSG00000102096.9	11040	PIM2
ENSG00000100304.12	23170	TTLL12
ENSG00000085872.14	10523	CHERP
ENSG00000072864.14	54820	NDE1
ENSG00000173581.7	29903	CCDC106
ENSG00000172375.13	9854	C2CD2L
ENSG00000154153.13	54463	RETREG1
ENSG00000149532.15	79869	CPSF7
ENSG00000141084.10	57610	RANBP10
ENSG00000130175.9	5589	PRKCSH
ENSG00000110844.13	25766	PRPF40B
ENSG00000105643.9	27106	ARRDC2
ENSG00000253719.3	552889	ATXN7L3B
ENSG00000214706.10	7866	IFRD2
ENSG00000213983.11	8906	AP1G2
ENSG00000204472.12	199	AIF1
ENSG00000178732.5	2814	GP5
ENSG00000161013.16	11282	MGAT4B
ENSG00000141576.15	114804	RNF157
ENSG00000128159.11	85378	TUBGCP6
ENSG00000099139.13	5125	PCSK5
ENSG00000089159.16	5829	PXN
ENSG00000088899.15	9762	LZTS3
ENSG00000054277.13	23596	OPN3
ENSG00000187764.11	10507	SEMA4D
ENSG00000184602.5	8303	SNN
ENSG00000179855.6	126326	GIPC3
ENSG00000178971.14	80169	CTC1
ENSG00000175130.6	65108	MARCKSL1
ENSG00000158966.14	57685	CACHD1
ENSG00000155229.20	64210	MMS19
ENSG00000154358.20	84033	OBSCN
ENSG00000143569.18	9898	UBAP2L
ENSG00000142207.6	9875	URB1
ENSG00000129422.14	57509	MTUS1
ENSG00000117643.14	57134	MAN1C1
ENSG00000089597.17	23193	GANAB
ENSG00000189152.10	400581	GRAPL
ENSG00000188878.19	85302	FBF1
ENSG00000169718.17	64118	DUS1L
ENSG00000167595.15	148137	PROSER3
ENSG00000167261.13	64174	DPEP2
ENSG00000163864.16	349565	NMNAT3
ENSG00000143167.11	10223	GPA33
ENSG00000141858.11	90378	SAMD1
ENSG00000139718.10	23067	SETD1B
ENSG00000130005.12	2593	GAMT
ENSG00000119147.9	84417	C2orf40
ENSG00000106144.19	835	CASP2
ENSG00000104870.12	2217	FCGRT
ENSG00000088387.18	23348	DOCK9
ENSG00000284308.1	388963	C2orf81
ENSG00000206190.11	57194	ATP10A
ENSG00000196372.12	79754	ASB13
ENSG00000186174.12	283149	BCL9L
ENSG00000185019.16	22888	UBOX5
ENSG00000173327.7	4296	MAP3K11
ENSG00000166681.13	27018	BEX3
ENSG00000149091.15	8525	DGKZ
ENSG00000130193.7	51337	THEM6
ENSG00000129347.19	65095	KRI1
ENSG00000102934.9	51090	PLLP
ENSG00000077238.13	3566	IL4R
ENSG00000220205.8	6844	VAMP2
ENSG00000220008.3	645191	LINGO3
ENSG00000204219.10	6920	TCEA3
ENSG00000168067.11	5871	MAP4K2
ENSG00000158864.12	4720	NDUFS2
ENSG00000157693.14	203197	TMEM268
ENSG00000149499.11	256364	EML3
ENSG00000146826.16	55262	C7orf43
ENSG00000145016.15	9711	RUBCN
ENSG00000106123.11	2051	EPHB6
ENSG00000099904.15	29801	ZDHHC8
ENSG00000198837.9	9909	DENND4B
ENSG00000171115.3	155038	GIMAP8
ENSG00000167642.12	10653	SPINT2
ENSG00000166783.21	9665	MARF1
ENSG00000163348.3	90780	PYGO2
ENSG00000146830.10	64599	GIGYF1
ENSG00000137642.12	6653	SORL1
ENSG00000136280.16	83605	CCM2
ENSG00000110448.10	921	CD5
ENSG00000102125.15	6901	TAZ
ENSG00000100345.21	4627	MYH9
ENSG00000090238.11	83719	YPEL3
ENSG00000089012.14	55423	SIRPG
ENSG00000000003.14	7105	TSPAN6
ENSG00000215012.8	79680	RTL10
ENSG00000186635.14	116985	ARAP1
ENSG00000169100.13	293	SLC25A6
ENSG00000163050.16	56997	COQ8A
ENSG00000157303.10	203328	SUSD3
ENSG00000133256.12	5158	PDE6B
ENSG00000127585.11	146330	FBXL16
ENSG00000126602.10	10131	TRAP1
ENSG00000112576.12	896	CCND3
ENSG00000090975.12	57605	PITPNM2
ENSG00000065000.17	8943	AP3D1
ENSG00000204371.11	10919	EHMT2
ENSG00000198089.15	9814	SFI1
ENSG00000182197.11	2131	EXT1
ENSG00000167895.14	147138	TMC8
ENSG00000166398.12	9710	KIAA0355
ENSG00000165795.23	57447	NDRG2
ENSG00000164091.11	80335	WDR82
ENSG00000161267.11	622	BDH1
ENSG00000154814.13	92106	OXNAD1
ENSG00000149970.15	22866	CNKSR2
ENSG00000137817.16	56965	PARP6
ENSG00000134882.15	337867	UBAC2
ENSG00000133561.15	474344	GIMAP6
ENSG00000132589.15	2319	FLOT2
ENSG00000108262.15	28964	GIT1
ENSG00000105639.18	3718	JAK3
ENSG00000089486.16	29965	CDIP1
ENSG00000069998.12	27440	HDHD5
ENSG00000064687.12	10347	ABCA7
ENSG00000023892.10	50619	DEF6
ENSG00000198624.12	26112	CCDC69
ENSG00000179222.17	9500	MAGED1
ENSG00000174669.11	3177	SLC29A2
ENSG00000100994.11	5834	PYGB
ENSG00000090615.14	2802	GOLGA3
ENSG00000089820.15	393	ARHGAP4
ENSG00000013523.9	23357	ANGEL1
ENSG00000240849.10	387521	TMEM189
ENSG00000205268.10	5150	PDE7A
ENSG00000186517.13	257106	ARHGAP30
ENSG00000186049.8	319101	KRT73
ENSG00000175662.17	146691	TOM1L2
ENSG00000169925.16	8019	BRD3
ENSG00000137266.14	63027	SLC22A23
ENSG00000133111.3	5994	RFXAP
ENSG00000112294.12	7915	ALDH5A1
ENSG00000105472.12	6320	CLEC11A
ENSG00000071051.13	8440	NCK2
ENSG00000276293.4	8396	PIP4K2B
ENSG00000271447.5	79148	MMP28
ENSG00000203880.11	55251	PCMTD2
ENSG00000198520.11	339541	ARMH1
ENSG00000197283.16	8831	SYNGAP1
ENSG00000182473.21	23265	EXOC7
ENSG00000166507.17	8509	NDST2
ENSG00000165138.17	203286	ANKS6
ENSG00000163545.8	81788	NUAK2
ENSG00000149187.18	10658	CELF1
ENSG00000142327.12	57140	RNPEPL1
ENSG00000141456.14	27043	PELP1
ENSG00000140474.13	25989	ULK3
ENSG00000133422.12	22880	MORC2
ENSG00000127580.16	84219	WDR24
ENSG00000124222.22	8675	STX16
ENSG00000116983.12	51440	HPCAL4
ENSG00000115896.15	5334	PLCL1
ENSG00000113319.12	5924	RASGRF2
ENSG00000100335.14	54471	MIEF1
ENSG00000091542.8	54890	ALKBH5
ENSG00000070366.13	23293	SMG6
ENSG00000013583.9	50865	HEBP1
ENSG00000006638.11	6915	TBXA2R
ENSG00000257093.6	57189	KIAA1147
ENSG00000189091.12	23450	SF3B3
ENSG00000176531.10	653583	PHLDB3
ENSG00000174885.12	171389	NLRP6
ENSG00000172005.10	4118	MAL
ENSG00000160613.12	9159	PCSK7
ENSG00000160208.12	23076	RRP1B
ENSG00000154764.5	7476	WNT7A
ENSG00000148908.14	6001	RGS10
ENSG00000135372.8	55226	NAT10
ENSG00000127334.10	8445	DYRK2
ENSG00000125731.12	10045	SH2D3A
ENSG00000119596.17	56252	YLPM1
ENSG00000117322.17	1380	CR2
ENSG00000112394.16	117247	SLC16A10
ENSG00000070423.17	55658	RNF126
ENSG00000064932.15	22904	SBNO2
ENSG00000196155.12	25894	PLEKHG4
ENSG00000188559.14	57186	RALGAPA2
ENSG00000185915.5	257240	KLHL34
ENSG00000174231.16	10594	PRPF8
ENSG00000169220.17	10636	RGS14
ENSG00000164649.19	55536	CDCA7L
ENSG00000159339.13	23569	PADI4
ENSG00000156398.12	118980	SFXN2
ENSG00000154930.14	84532	ACSS1
ENSG00000152256.13	5163	PDK1
ENSG00000149260.16	726	CAPN5
ENSG00000136261.14	28969	BZW2
ENSG00000131653.12	84231	TRAF7
ENSG00000120942.13	29914	UBIAD1
ENSG00000120896.13	10174	SORBS3
ENSG00000110987.8	605	BCL7A
ENSG00000100599.15	79890	RIN3
ENSG00000099330.8	79629	OCEL1
ENSG00000079435.9	3991	LIPE
ENSG00000066230.11	6550	SLC9A3
ENSG00000009790.14	80342	TRAF3IP3
ENSG00000187535.13	9742	IFT140
ENSG00000181513.14	79777	ACBD4
ENSG00000178665.15	349075	ZNF713
ENSG00000175309.14	85007	PHYKPL
ENSG00000172164.14	6641	SNTB1
ENSG00000167615.16	114823	LENG8
ENSG00000166126.10	81693	AMN
ENSG00000163513.17	7048	TGFBR2
ENSG00000157954.14	26100	WIPI2
ENSG00000132694.18	9826	ARHGEF11
ENSG00000088256.8	2767	GNA11
ENSG00000071054.16	9448	MAP4K4
ENSG00000188404.8	6402	SELL
ENSG00000188021.8	29978	UBQLN2
ENSG00000183688.4	359845	RFLNB
ENSG00000176171.11	664	BNIP3
ENSG00000173511.9	7423	VEGFB
ENSG00000165271.16	65083	NOL6
ENSG00000151692.14	9781	RNF144A
ENSG00000143811.18	29920	PYCR2
ENSG00000143624.13	65123	INTS3
ENSG00000136002.18	50649	ARHGEF4
ENSG00000134909.18	9743	ARHGAP32
ENSG00000134516.16	1794	DOCK2
ENSG00000126353.3	1236	CCR7
ENSG00000126217.20	23263	MCF2L
ENSG00000111716.12	3945	LDHB
ENSG00000107833.10	10360	NPM3
ENSG00000105519.15	828	CAPS
ENSG00000103202.12	4833	NME4
ENSG00000088247.17	8570	KHSRP
ENSG00000071073.12	11320	MGAT4A
ENSG00000008710.19	5310	PKD1
ENSG00000243477.5	24142	NAA80
ENSG00000232859.9	201229	LYRM9
ENSG00000224051.6	80772	CPTP
ENSG00000213672.7	51517	NCKIPSD
ENSG00000197183.14	140688	NOL4L
ENSG00000188976.10	26155	NOC2L
ENSG00000184014.7	23258	DENND5A
ENSG00000180096.11	1731	SEPT1
ENSG00000179364.13	23241	PACS2
ENSG00000174080.10	8722	CTSF
ENSG00000167815.11	7001	PRDX2
ENSG00000165617.14	51339	DACT1
ENSG00000148341.17	56904	SH3GLB2
ENSG00000145217.13	10861	SLC26A1
ENSG00000140443.14	3480	IGF1R
ENSG00000136068.14	2317	FLNB
ENSG00000124466.8	27076	LYPD3
ENSG00000117298.15	1889	ECE1
ENSG00000099381.17	9739	SETD1A
ENSG00000166997.7	245812	CNPY4
ENSG00000165915.13	91252	SLC39A13
ENSG00000161791.13	91010	FMNL3
ENSG00000159445.12	117145	THEM4
ENSG00000146904.8	2041	EPHA1
ENSG00000146828.17	56996	SLC12A9
ENSG00000142765.17	84958	SYTL1
ENSG00000137411.17	57176	VARS2
ENSG00000134900.11	7174	TPP2
ENSG00000116852.14	23046	KIF21B
ENSG00000102967.11	1723	DHODH
ENSG00000101361.16	10528	NOP56
ENSG00000092621.12	26227	PHGDH
ENSG00000013810.18	10460	TACC3
ENSG00000177733.6	10949	HNRNPA0
ENSG00000170006.11	201799	TMEM154
ENSG00000166387.12	8495	PPFIBP2
ENSG00000166326.6	54765	TRIM44
ENSG00000163788.13	54861	SNRK
ENSG00000159023.21	2035	EPB41
ENSG00000144476.5	57007	ACKR3
ENSG00000124243.17	55653	BCAS4
ENSG00000117602.11	11123	RCAN3
ENSG00000111863.12	84830	ADTRP
ENSG00000104228.12	23087	TRIM35
ENSG00000084070.11	64744	SMAP2
ENSG00000071894.16	29894	CPSF1
ENSG00000069424.14	8514	KCNAB2
ENSG00000059915.16	5662	PSD
ENSG00000013306.15	51629	SLC25A39
ENSG00000007202.14	9703	KIAA0100
ENSG00000213658.11	27040	LAT
ENSG00000204580.13	780	DDR1
ENSG00000174483.19	582	BBS1
ENSG00000171097.13	883	KYAT1
ENSG00000147144.12	90060	CCDC120
ENSG00000138439.11	150864	FAM117B
ENSG00000137312.14	10211	FLOT1
ENSG00000133134.11	84707	BEX2
ENSG00000127415.12	3425	IDUA
ENSG00000112667.12	10591	DNPH1
ENSG00000111348.8	397	ARHGDIB
ENSG00000105088.8	93145	OLFM2
ENSG00000101220.17	54976	C20orf27
ENSG00000099797.14	9524	TECR
ENSG00000057019.15	131566	DCBLD2
ENSG00000271601.3	128077	LIX1L
ENSG00000184867.13	9823	ARMCX2
ENSG00000178719.16	2907	GRINA
ENSG00000167526.13	6137	RPL13
ENSG00000164054.15	51246	SHISA5
ENSG00000162836.11	51205	ACP6
ENSG00000162241.12	283130	SLC25A45
ENSG00000156052.10	2776	GNAQ
ENSG00000154229.11	5578	PRKCA
ENSG00000154059.10	55364	IMPACT
ENSG00000139626.15	3695	ITGB7
ENSG00000135966.12	9392	TGFBRAP1
ENSG00000108828.15	10493	VAT1
ENSG00000100139.13	85377	MICALL1
ENSG00000080845.17	22839	DLGAP4
ENSG00000074706.13	26034	IPCEF1
ENSG00000072163.19	55679	LIMS2
ENSG00000062822.13	5424	POLD1
ENSG00000052795.12	57600	FNIP2
ENSG00000184178.15	152579	SCFD2
ENSG00000181652.19	285973	ATG9B
ENSG00000179820.15	91663	MYADM
ENSG00000176476.8	112869	SGF29
ENSG00000173926.5	115123	MARCH3
ENSG00000169733.11	5986	RFNG
ENSG00000168872.16	55308	DDX19A
ENSG00000166619.13	10904	BLCAP
ENSG00000166311.9	6609	SMPD1
ENSG00000160712.12	3570	IL6R
ENSG00000159761.14	388284	C16orf86
ENSG00000149547.14	9538	EI24
ENSG00000148843.14	22984	PDCD11
ENSG00000143110.11	128346	C1orf162
ENSG00000132749.10	9633	TESMIN
ENSG00000131368.7	64432	MRPS25
ENSG00000126970.15	55906	ZC4H2
ENSG00000100034.13	9647	PPM1F
ENSG00000087274.16	118	ADD1
ENSG00000011523.13	23177	CEP68
ENSG00000010292.12	9918	NCAPD2
ENSG00000211450.9	280636	SELENOH
ENSG00000204394.12	7407	VARS
ENSG00000188917.14	79979	TRMT2B
ENSG00000185267.9	441549	CDNF
ENSG00000182108.10	28955	DEXI
ENSG00000177731.15	2314	FLII
ENSG00000176444.18	1196	CLK2
ENSG00000153574.8	22934	RPIA
ENSG00000141699.10	162427	RETREG3
ENSG00000140199.11	9990	SLC12A6
ENSG00000135519.7	23416	KCNH3
ENSG00000133313.14	55748	CNDP2
ENSG00000125637.15	23550	PSD4
ENSG00000121104.7	81558	FAM117A
ENSG00000113719.15	57222	ERGIC1
ENSG00000111203.12	55846	ITFG2
ENSG00000110011.13	3338	DNAJC4
ENSG00000092096.16	51310	SLC22A17
ENSG00000071889.16	60343	FAM3A
ENSG00000058453.16	9696	CROCC
ENSG00000237441.9	5863	RGL2
ENSG00000196405.12	51466	EVL
ENSG00000178188.14	25970	SH2B1
ENSG00000170222.11	56985	ADPRM
ENSG00000169871.12	81844	TRIM56
ENSG00000167674.14	84717	HDGFL2
ENSG00000166508.17	4176	MCM7
ENSG00000163703.17	78987	CRELD1
ENSG00000162378.12	79699	ZYG11B
ENSG00000146576.12	79034	C7orf26
ENSG00000146409.11	116843	SLC18B1
ENSG00000145029.13	84276	NICN1
ENSG00000141569.11	201292	TRIM65
ENSG00000137841.11	5330	PLCB2
ENSG00000132405.18	57533	TBC1D14
ENSG00000132394.10	60678	EEFSEC
ENSG00000129103.17	25870	SUMF2
ENSG00000108439.10	55163	PNPO
ENSG00000107902.13	64077	LHPP
ENSG00000102409.9	56271	BEX4
ENSG00000102181.20	83692	CD99L2
ENSG00000101405.3	5020	OXT
ENSG00000083123.14	594	BCKDHB
ENSG00000081760.16	65985	AACS
ENSG00000228594.3	643988	FNDC10
ENSG00000205307.11	100316904	SAP25
ENSG00000181045.14	284129	SLC26A11
ENSG00000174151.14	284613	CYB561D1
ENSG00000154328.15	252969	NEIL2
ENSG00000154134.14	64221	ROBO3
ENSG00000149932.16	124446	TMEM219
ENSG00000147804.9	55630	SLC39A4
ENSG00000146021.14	26249	KLHL3
ENSG00000141985.9	6455	SH3GL1
ENSG00000135686.12	79786	KLHL36
ENSG00000132600.16	54496	PRMT7
ENSG00000125354.22	23157	SEPT6
ENSG00000107104.18	23189	KANK1
ENSG00000104880.17	23370	ARHGEF18
ENSG00000090006.17	8425	LTBP4
ENSG00000072818.11	9744	ACAP1
ENSG00000070756.15	26986	PABPC1
ENSG00000066923.17	10734	STAG3
ENSG00000257108.1	283948	NHLRC4
ENSG00000177051.5	23403	FBXO46
ENSG00000166887.15	23339	VPS39
ENSG00000156471.12	9791	PTDSS1
ENSG00000148384.12	56623	INPP5E
ENSG00000143409.15	55793	MINDY1
ENSG00000137218.10	10817	FRS3
ENSG00000137070.17	3590	IL11RA
ENSG00000135919.12	5270	SERPINE2
ENSG00000134644.15	9698	PUM1
ENSG00000131686.14	765	CA6
ENSG00000126759.13	5199	CFP
ENSG00000123453.17	1757	SARDH
ENSG00000121775.17	55116	TMEM39B
ENSG00000114779.19	84836	ABHD14B
ENSG00000112655.15	5754	PTK7
ENSG00000111540.15	5869	RAB5B
ENSG00000106003.12	3955	LFNG
ENSG00000100092.22	23616	SH3BP1
ENSG00000064886.13	1117	CHI3L2
ENSG00000037042.8	27175	TUBG2
ENSG00000213930.11	2592	GALT
ENSG00000213918.10	1773	DNASE1
ENSG00000204228.3	7923	HSD17B8
ENSG00000164897.12	83590	TMUB1
ENSG00000164062.12	327	APEH
ENSG00000160075.11	29101	SSU72
ENSG00000159496.14	266747	RGL4
ENSG00000157184.6	1376	CPT2
ENSG00000154743.17	80746	TSEN2
ENSG00000149823.8	738	VPS51
ENSG00000146834.13	56257	MEPCE
ENSG00000136059.14	50853	VILL
ENSG00000124374.8	400961	PAIP2B
ENSG00000107341.4	54926	UBE2R2
ENSG00000100413.16	171568	POLR3H
ENSG00000100316.15	6122	RPL3
ENSG00000077549.17	832	CAPZB
ENSG00000227507.2	4050	LTB
ENSG00000211584.13	55652	SLC48A1
ENSG00000204673.10	84335	AKT1S1
ENSG00000198133.8	161145	TMEM229B
ENSG00000197586.12	955	ENTPD6
ENSG00000188807.12	199953	TMEM201
ENSG00000188266.13	123688	HYKK
ENSG00000177225.16	347862	GATD1
ENSG00000175643.9	116028	RMI2
ENSG00000173597.8	27284	SULT1B1
ENSG00000162144.9	220002	CYB561A3
ENSG00000156345.17	23552	CDK20
ENSG00000146083.11	22838	RNF44
ENSG00000140092.14	10516	FBLN5
ENSG00000105655.18	51477	ISYNA1
ENSG00000105173.13	898	CCNE1
ENSG00000090020.10	6548	SLC9A1
ENSG00000087365.15	10992	SF3B2
ENSG00000072071.16	22859	ADGRL1
ENSG00000033627.16	535	ATP6V0A1
ENSG00000007255.10	79090	TRAPPC6A
ENSG00000197226.12	23061	TBC1D9B
ENSG00000179088.14	374470	C12orf42
ENSG00000175155.8	388403	YPEL2
ENSG00000172867.3	3849	KRT2
ENSG00000170037.13	116840	CNTROB
ENSG00000167280.16	64772	ENGASE
ENSG00000164300.16	256987	SERINC5
ENSG00000161381.13	57125	PLXDC1
ENSG00000142102.15	80162	PGGHG
ENSG00000141194.6	26689	OR4D1
ENSG00000136153.19	4008	LMO7
ENSG00000135643.4	27345	KCNMB4
ENSG00000133243.8	55643	BTBD2
ENSG00000131508.15	7322	UBE2D2
ENSG00000131069.19	55902	ACSS2
ENSG00000130299.16	84705	GTPBP3
ENSG00000124608.4	57505	AARS2
ENSG00000123143.12	5585	PKN1
ENSG00000119514.6	79695	GALNT12
ENSG00000099953.9	4320	MMP11
ENSG00000088543.14	51161	C3orf18
ENSG00000034510.5	9168	TMSB10
ENSG00000214078.12	8904	CPNE1
ENSG00000213420.7	221914	GPC2
ENSG00000197568.13	11147	HHLA3
ENSG00000179715.12	91523	PCED1B
ENSG00000178605.13	8225	GTPBP6
ENSG00000173848.18	10276	NET1
ENSG00000167733.13	374875	HSD11B1L
ENSG00000164587.12	6208	RPS14
ENSG00000140400.16	4123	MAN2C1
ENSG00000116191.17	55103	RALGPS2
ENSG00000113648.16	9555	H2AFY
ENSG00000100600.14	5641	LGMN
ENSG00000100350.14	80020	FOXRED2
ENSG00000100116.16	23464	GCAT
ENSG00000005187.11	6296	ACSM3
ENSG00000196352.15	1604	CD55
ENSG00000189283.9	2272	FHIT
ENSG00000171700.13	10287	RGS19
ENSG00000169964.7	131616	TMEM42
ENSG00000168890.13	129303	TMEM150A
ENSG00000168421.12	399	RHOH
ENSG00000165140.10	2203	FBP1
ENSG00000162496.8	9249	DHRS3
ENSG00000160307.9	6285	S100B
ENSG00000148985.19	27315	PGAP2
ENSG00000142606.15	79258	MMEL1
ENSG00000139998.15	376267	RAB15
ENSG00000139610.1	1990	CELA1
ENSG00000136156.13	9445	ITM2B
ENSG00000115652.14	80146	UXS1
ENSG00000106789.12	7464	CORO2A
ENSG00000105289.14	27134	TJP3
ENSG00000073050.11	7515	XRCC1
ENSG00000053702.14	83714	NRIP2
ENSG00000243279.3	11230	PRAF2
ENSG00000188493.14	284325	C19orf54
ENSG00000185262.8	283991	UBALD2
ENSG00000182541.17	3985	LIMK2
ENSG00000177105.9	391	RHOG
ENSG00000176953.12	84901	NFATC2IP
ENSG00000174514.12	148808	MFSD4A
ENSG00000172578.11	89857	KLHL6
ENSG00000172057.9	94103	ORMDL3
ENSG00000164241.13	401207	C5orf63
ENSG00000163520.13	2199	FBLN2
ENSG00000160439.15	112724	RDH13
ENSG00000151882.11	56477	CCL28
ENSG00000138617.15	54956	PARP16
ENSG00000137103.19	51754	TMEM8B
ENSG00000133056.13	5287	PIK3C2B
ENSG00000132635.16	64773	PCED1A
ENSG00000115468.11	80303	EFHD1
ENSG00000111271.14	80724	ACAD10
ENSG00000105221.16	208	AKT2
ENSG00000090554.12	2323	FLT3LG
ENSG00000083290.19	9706	ULK2
ENSG00000071242.11	6196	RPS6KA2
ENSG00000043143.20	23338	JADE2
ENSG00000204843.12	1639	DCTN1
ENSG00000198934.4	57692	MAGEE1
ENSG00000197296.5	128486	FITM2
ENSG00000188706.12	51114	ZDHHC9
ENSG00000184428.12	116447	TOP1MT
ENSG00000174791.10	9610	RIN1
ENSG00000172053.17	5859	QARS
ENSG00000168612.4	90204	ZSWIM1
ENSG00000162408.10	79707	NOL9
ENSG00000159399.9	3099	HK2
ENSG00000149269.9	5058	PAK1
ENSG00000145287.10	51316	PLAC8
ENSG00000145247.11	132299	OCIAD2
ENSG00000144815.15	91775	NXPE3
ENSG00000141522.11	396	ARHGDIA
ENSG00000135423.12	27165	GLS2
ENSG00000131507.10	80762	NDFIP1
ENSG00000130653.15	375775	PNPLA7
ENSG00000123064.12	79039	DDX54
ENSG00000115425.13	55825	PECR
ENSG00000103351.12	23059	CLUAP1
ENSG00000099910.16	84861	KLHL22
ENSG00000263528.7	9641	IKBKE
ENSG00000238227.7	90120	TMEM250
ENSG00000213465.7	402	ARL2
ENSG00000186532.11	114826	SMYD4
ENSG00000178035.11	3615	IMPDH2
ENSG00000172992.11	79877	DCAKD
ENSG00000172663.8	80194	TMEM134
ENSG00000172345.13	80765	STARD5
ENSG00000171045.14	203062	TSNARE1
ENSG00000168887.10	388969	C2orf68
ENSG00000166971.16	64400	AKTIP
ENSG00000164512.17	79722	ANKRD55
ENSG00000164086.9	1849	DUSP7
ENSG00000157881.13	55229	PANK4
ENSG00000138449.10	30061	SLC40A1
ENSG00000137700.18	2542	SLC37A4
ENSG00000133805.15	272	AMPD3
ENSG00000125246.15	171425	CLYBL
ENSG00000113749.7	3274	HRH2
ENSG00000105640.12	6142	RPL18A
ENSG00000101347.9	25939	SAMHD1
ENSG00000087152.15	56970	ATXN7L3
ENSG00000044446.11	5256	PHKA2
ENSG00000215375.6	4636	MYL5
ENSG00000185522.8	256329	LMNTD2
ENSG00000172878.13	254042	METAP1D
ENSG00000168758.10	54910	SEMA4C
ENSG00000166582.9	201161	CENPV
ENSG00000164398.12	23305	ACSL6
ENSG00000158195.10	10163	WASF2
ENSG00000156521.13	219743	TYSND1
ENSG00000145428.14	285533	RNF175
ENSG00000132386.10	5176	SERPINF1
ENSG00000128973.12	54982	CLN6
ENSG00000115204.14	4358	MPV17
ENSG00000112659.13	23113	CUL9
ENSG00000110711.9	9049	AIP
ENSG00000015676.17	23386	NUDCD3
ENSG00000010610.9	920	CD4
ENSG00000001461.16	57185	NIPAL3
ENSG00000213995.11	55739	NAXD
ENSG00000204628.11	10399	RACK1
ENSG00000198931.10	353	APRT
ENSG00000198851.9	916	CD3E
ENSG00000197724.10	5253	PHF2
ENSG00000179598.5	201164	PLD6
ENSG00000176928.5	51301	GCNT4
ENSG00000154127.9	84959	UBASH3B
ENSG00000142546.13	51070	NOSIP
ENSG00000134986.13	9315	NREP
ENSG00000126001.15	11190	CEP250
ENSG00000121310.16	55268	ECHDC2
ENSG00000113504.20	10723	SLC12A7
ENSG00000108389.9	9110	MTMR4
ENSG00000103145.10	54985	HCFC1R1
ENSG00000092847.11	26523	AGO1
ENSG00000213339.8	81890	QTRT1
ENSG00000204271.12	169981	SPIN3
ENSG00000178222.12	285498	RNF212
ENSG00000176273.14	159371	SLC35G1
ENSG00000174721.9	143282	FGFBP3
ENSG00000173890.16	26996	GPR160
ENSG00000164849.9	115330	GPR146
ENSG00000159128.14	3460	IFNGR2
ENSG00000145912.8	55651	NHP2
ENSG00000136026.13	10970	CKAP4
ENSG00000135473.14	9924	PAN2
ENSG00000133872.13	51669	SARAF
ENSG00000119638.12	91754	NEK9
ENSG00000115694.14	10494	STK25
ENSG00000105373.18	29997	NOP53
ENSG00000004139.13	23098	SARM1
ENSG00000226742.3	440498	HSBP1L1
ENSG00000215251.3	60493	FASTKD5
ENSG00000203710.11	1378	CR1
ENSG00000168685.14	3575	IL7R
ENSG00000149115.13	85456	TNKS1BP1
ENSG00000141665.12	201456	FBXO15
ENSG00000139197.10	5830	PEX5
ENSG00000135185.11	79161	TMEM243
ENSG00000126243.8	79414	LRFN3
ENSG00000116396.14	3749	KCNC4
ENSG00000113552.15	10007	GNPDA1
ENSG00000100714.15	4522	MTHFD1
ENSG00000037757.13	84245	MRI1
ENSG00000250479.8	400916	CHCHD10
ENSG00000184083.11	54954	FAM120C
ENSG00000172554.11	54221	SNTG2
ENSG00000165272.15	360	AQP3
ENSG00000160013.8	5739	PTGIR
ENSG00000158109.14	127262	TPRG1L
ENSG00000157014.10	9797	TATDN2
ENSG00000153551.13	112616	CMTM7
ENSG00000147408.14	55790	CSGALNACT1
ENSG00000145916.18	64777	RMND5B
ENSG00000145425.9	6189	RPS3A
ENSG00000144647.5	84892	POMGNT2
ENSG00000137038.7	90871	DMAC1
ENSG00000114631.10	50512	PODXL2
ENSG00000110107.8	27339	PRPF19
ENSG00000107815.9	56652	TWNK
ENSG00000104660.18	23484	LEPROTL1
ENSG00000101199.12	55738	ARFGAP1
ENSG00000073331.17	80216	ALPK1
ENSG00000215845.10	100131187	TSTD1
ENSG00000175040.5	9435	CHST2
ENSG00000171791.12	596	BCL2
ENSG00000170473.16	84305	PYM1
ENSG00000146701.11	4191	MDH2
ENSG00000138363.14	471	ATIC
ENSG00000132383.11	6117	RPA1
ENSG00000118420.16	90025	UBE3D
ENSG00000102805.14	1203	CLN5
ENSG00000101444.12	191	AHCY
ENSG00000089327.14	53827	FXYD5
ENSG00000082146.12	55437	STRADB
ENSG00000066084.12	57609	DIP2B
ENSG00000198918.7	6170	RPL39
ENSG00000197147.13	23507	LRRC8B
ENSG00000182871.14	80781	COL18A1
ENSG00000177272.8	3738	KCNA3
ENSG00000175390.13	8665	EIF3F
ENSG00000169189.16	197370	NSMCE1
ENSG00000167658.15	1938	EEF2
ENSG00000160014.16	808	CALM3
ENSG00000158525.15	93979	CPA5
ENSG00000157191.19	55707	NECAP2
ENSG00000150990.7	57647	DHX37
ENSG00000148218.15	210	ALAD
ENSG00000130595.18	7140	TNNT3
ENSG00000130309.10	79709	COLGALT1
ENSG00000119711.12	4329	ALDH6A1
ENSG00000115257.15	54760	PCSK4
ENSG00000115255.10	92840	REEP6
ENSG00000104998.3	9466	IL27RA
ENSG00000104689.9	8797	TNFRSF10A
ENSG00000177951.17	51272	BET1L
ENSG00000172824.15	283848	CES4A
ENSG00000171224.8	219738	FAM241B
ENSG00000170486.10	140807	KRT72
ENSG00000157873.17	8764	TNFRSF14
ENSG00000141524.15	11322	TMC6
ENSG00000135503.12	91	ACVR1B
ENSG00000120055.7	79946	C10orf95
ENSG00000103550.13	400506	KNOP1
ENSG00000101849.16	6907	TBL1X
ENSG00000090621.13	8761	PABPC4
ENSG00000071082.10	6160	RPL31
ENSG00000035115.21	26751	SH3YL1
ENSG00000273045.6	150590	C2orf15
ENSG00000221946.7	53822	FXYD7
ENSG00000184489.11	11156	PTP4A3
ENSG00000182196.13	51329	ARL6IP4
ENSG00000179832.17	727957	MROH1
ENSG00000173638.18	6573	SLC19A1
ENSG00000167414.4	94235	GNG8
ENSG00000165568.17	83592	AKR1E2
ENSG00000160284.14	84221	SPATC1L
ENSG00000151715.7	120224	TMEM45B
ENSG00000151136.14	121551	BTBD11
ENSG00000145882.10	78991	PCYOX1L
ENSG00000144567.10	79137	RETREG2
ENSG00000129925.10	58986	TMEM8A
ENSG00000067113.16	8611	PLPP1
ENSG00000041880.14	10039	PARP3
ENSG00000256043.2	1519	CTSO
ENSG00000174136.11	285704	RGMB
ENSG00000170293.8	152189	CMTM8
ENSG00000170190.15	9121	SLC16A5
ENSG00000168575.9	6575	SLC20A2
ENSG00000167747.14	84798	C19orf48
ENSG00000166441.12	6157	RPL27A
ENSG00000146416.18	51390	AIG1
ENSG00000144120.12	80775	TMEM177
ENSG00000143486.15	1939	EIF2D
ENSG00000142192.20	351	APP
ENSG00000140545.14	4240	MFGE8
ENSG00000130741.10	1968	EIF2S3
ENSG00000116649.9	6723	SRM
ENSG00000114735.9	51409	HEMK1
ENSG00000100023.18	23759	PPIL2
ENSG00000204310.12	10554	AGPAT1
ENSG00000184787.18	7327	UBE2G2
ENSG00000175414.6	285598	ARL10
ENSG00000167861.15	283987	HID1
ENSG00000163704.11	285368	PRRT3
ENSG00000160767.20	10712	FAM189B
ENSG00000155016.17	113612	CYP2U1
ENSG00000142920.16	113451	AZIN2
ENSG00000133597.10	90956	ADCK2
ENSG00000101546.12	79863	RBFA
ENSG00000101191.16	11083	DIDO1
ENSG00000101161.7	24148	PRPF6
ENSG00000249115.8	23354	HAUS5
ENSG00000184465.16	253769	WDR27
ENSG00000175707.8	126695	KDF1
ENSG00000175482.8	57804	POLD4
ENSG00000174837.14	2015	ADGRE1
ENSG00000169231.13	7059	THBS3
ENSG00000166197.16	9221	NOLC1
ENSG00000165175.15	58526	MID1IP1
ENSG00000149273.14	6188	RPS3
ENSG00000140511.11	145864	HAPLN3
ENSG00000139291.13	55266	TMEM19
ENSG00000121057.12	8165	AKAP1
ENSG00000118181.10	6230	RPS25
ENSG00000114544.16	54946	SLC41A3
ENSG00000099624.7	513	ATP5F1D
ENSG00000031823.14	8498	RANBP3
ENSG00000012779.10	240	ALOX5
ENSG00000005059.15	55013	MCUB
ENSG00000254772.9	1937	EEF1G
ENSG00000231500.6	6222	RPS18
ENSG00000213563.6	414919	C8orf82
ENSG00000172954.13	253558	LCLAT1
ENSG00000166669.13	80063	ATF7IP2
ENSG00000151490.13	5800	PTPRO
ENSG00000146278.10	10957	PNRC1
ENSG00000110455.13	84680	ACCS
ENSG00000107829.13	6468	FBXW4
ENSG00000088832.16	2280	FKBP1A
ENSG00000215915.9	219293	ATAD3C
ENSG00000214113.10	57128	LYRM4
ENSG00000183161.5	2188	FANCF
ENSG00000178093.13	83983	TSSK6
ENSG00000162585.16	199990	FAAP20
ENSG00000156508.17	1915	EEF1A1
ENSG00000156299.13	7074	TIAM1
ENSG00000155099.7	55529	PIP4P2
ENSG00000152465.17	9397	NMT2
ENSG00000126091.20	6487	ST3GAL3
ENSG00000108298.11	6143	RPL19
ENSG00000106771.12	23731	TMEM245
ENSG00000101911.12	5634	PRPS2
ENSG00000100445.17	56948	SDR39U1
ENSG00000070526.14	55808	ST6GALNAC1
ENSG00000010361.13	80199	FUZ
ENSG00000002822.15	8379	MAD1L1
ENSG00000204237.4	339229	OXLD1
ENSG00000196663.15	9895	TECPR2
ENSG00000172508.10	57571	CARNS1
ENSG00000163449.10	92691	TMEM169
ENSG00000160185.14	53347	UBASH3A
ENSG00000156482.10	6156	RPL30
ENSG00000144713.12	6161	RPL32
ENSG00000134419.15	6210	RPS15A
ENSG00000130255.12	25873	RPL36
ENSG00000112306.7	6206	RPS12
ENSG00000109475.16	6164	RPL34
ENSG00000103502.13	10423	CDIPT
ENSG00000071575.11	28951	TRIB2
ENSG00000007350.16	8277	TKTL1
ENSG00000197448.13	373156	GSTK1
ENSG00000178038.16	259173	ALS2CL
ENSG00000155970.11	286097	MICU3
ENSG00000148468.16	221061	FAM171A1
ENSG00000145592.13	6167	RPL37
ENSG00000143502.14	55061	SUSD4
ENSG00000121410.11	1	A1BG
ENSG00000114268.11	5210	PFKFB4
ENSG00000108100.17	219771	CCNY
ENSG00000106244.12	11333	PDAP1
ENSG00000092036.18	54930	HAUS4
ENSG00000079691.17	55604	CARMIL1
ENSG00000063761.15	57143	ADCK1
ENSG00000250565.6	90423	ATP6V1E2
ENSG00000183260.7	140701	ABHD16B
ENSG00000177885.14	2885	GRB2
ENSG00000164713.9	25798	BRI3
ENSG00000147403.16	6134	RPL10
ENSG00000142552.7	57333	RCN3
ENSG00000138111.14	79847	MFSD13A
ENSG00000113249.12	26762	HAVCR1
ENSG00000113119.12	55374	TMCO6
ENSG00000102048.15	140462	ASB9
ENSG00000099810.19	4507	MTAP
ENSG00000079462.7	5050	PAFAH1B3
ENSG00000056972.18	10758	TRAF3IP2
ENSG00000198034.10	6191	RPS4X
ENSG00000187554.12	7100	TLR5
ENSG00000186468.12	6228	RPS23
ENSG00000169592.14	283899	INO80E
ENSG00000166347.18	1528	CYB5A
ENSG00000160714.9	55585	UBE2Q1
ENSG00000142676.14	6135	RPL11
ENSG00000139546.10	6895	TARBP2
ENSG00000136938.8	10541	ANP32B
ENSG00000123179.13	84650	EBPL
ENSG00000114854.7	7134	TNNC1
ENSG00000112877.7	55722	CEP72
ENSG00000069966.18	10681	GNB5
ENSG00000065485.19	10954	PDIA5
ENSG00000040933.15	3631	INPP4A
ENSG00000256806.5	388327	C17orf100
ENSG00000239900.12	158	ADSL
ENSG00000213741.10	6235	RPS29
ENSG00000185101.12	338440	ANO9
ENSG00000183486.12	4600	MX2
ENSG00000177600.8	6181	RPLP2
ENSG00000171858.17	6227	RPS21
ENSG00000171119.2	4902	NRTN
ENSG00000142687.17	79932	KIAA0319L
ENSG00000142541.16	23521	RPL13A
ENSG00000133460.19	66035	SLC2A11
ENSG00000130590.13	140700	SAMD10
ENSG00000130119.15	54552	GNL3L
ENSG00000110700.6	6207	RPS13
ENSG00000096060.14	2289	FKBP5
ENSG00000089876.11	55760	DHX32
ENSG00000027847.13	11285	B4GALT7
ENSG00000221916.3	55150	C19orf73
ENSG00000204681.10	2550	GABBR1
ENSG00000198208.11	83694	RPS6KL1
ENSG00000177192.13	80324	PUS1
ENSG00000170469.10	202051	SPATA24
ENSG00000149476.15	26007	TKFC
ENSG00000133466.13	114904	C1QTNF6
ENSG00000131469.14	6155	RPL27
ENSG00000095059.15	1725	DHPS
ENSG00000185442.12	400451	FAM174B
ENSG00000180902.17	728294	D2HGDH
ENSG00000166965.12	91433	RCCD1
ENSG00000155463.12	5018	OXA1L
ENSG00000148660.20	818	CAMK2G
ENSG00000134461.15	54522	ANKRD16
ENSG00000118816.9	10983	CCNI
ENSG00000112514.15	51596	CUTA
ENSG00000110446.10	51296	SLC15A3
ENSG00000050426.15	25875	LETMD1
ENSG00000229117.8	6171	RPL41
ENSG00000188846.13	9045	RPL14
ENSG00000184903.9	83943	IMMP2L
ENSG00000176533.12	2788	GNG7
ENSG00000174137.12	152877	FAM53A
ENSG00000137154.12	6194	RPS6
ENSG00000106633.15	2645	GCK
ENSG00000105255.10	79187	FSD1
ENSG00000083845.8	6193	RPS5
ENSG00000070770.8	1459	CSNK2A2
ENSG00000063177.12	6141	RPL18
ENSG00000228300.13	55009	C19orf24
ENSG00000213865.7	56260	C8orf44
ENSG00000184557.4	9021	SOCS3
ENSG00000178498.15	196403	DTX3
ENSG00000176155.18	284001	CCDC57
ENSG00000173762.7	924	CD7
ENSG00000164983.7	157378	TMEM65
ENSG00000164972.12	84688	C9orf24
ENSG00000162946.22	27185	DISC1
ENSG00000145919.10	91272	BOD1
ENSG00000140988.15	6187	RPS2
ENSG00000125430.8	9953	HS3ST3B1
ENSG00000114529.12	79669	C3orf52
ENSG00000101193.7	54994	GID8
ENSG00000248099.3	3640	INSL3
ENSG00000233927.4	6234	RPS28
ENSG00000196511.14	27010	TPK1
ENSG00000185885.15	8519	IFITM1
ENSG00000180901.10	23510	KCTD2
ENSG00000171444.17	4163	MCC
ENSG00000165689.16	10807	ENTR1
ENSG00000159792.9	5681	PSKH1
ENSG00000139668.8	115825	WDFY2
ENSG00000139625.12	7786	MAP3K12
ENSG00000134086.7	7428	VHL
ENSG00000133027.17	10400	PEMT
ENSG00000119383.19	5524	PTPA
ENSG00000117877.10	10849	CD3EAP
ENSG00000112146.16	26268	FBXO9
ENSG00000111057.10	3875	KRT18
ENSG00000105270.14	25999	CLIP3
ENSG00000076555.15	32	ACACB
ENSG00000197860.9	54557	SGTB
ENSG00000197361.7	283807	FBXL22
ENSG00000186231.16	114792	KLHL32
ENSG00000176749.8	8851	CDK5R1
ENSG00000175826.11	23399	CTDNEP1
ENSG00000167740.9	124936	CYB5D2
ENSG00000163462.17	80128	TRIM46
ENSG00000155974.12	23426	GRIP1
ENSG00000148219.16	23245	ASTN2
ENSG00000138794.9	839	CASP6
ENSG00000115170.13	90	ACVR1
ENSG00000103544.14	57020	VPS35L
ENSG00000100211.10	25776	CBY1
ENSG00000184898.6	375287	RBM43
ENSG00000182687.3	8811	GALR2
ENSG00000181191.11	64219	PJA1
ENSG00000180822.11	389362	PSMG4
ENSG00000172725.13	57175	CORO1B
ENSG00000162244.11	6159	RPL29
ENSG00000141232.4	10140	TOB1
ENSG00000135119.14	84900	RNFT2
ENSG00000124614.15	6204	RPS10
ENSG00000114942.13	1933	EEF1B2
ENSG00000108107.14	6158	RPL28
ENSG00000107736.20	64072	CDH23
ENSG00000104783.12	3783	KCNN4
ENSG00000263465.4	10929	SRSF8
ENSG00000197756.9	6168	RPL37A
ENSG00000177954.12	6232	RPS27
ENSG00000171680.21	57449	PLEKHG5
ENSG00000156510.12	80201	HKDC1
ENSG00000142937.11	6202	RPS8
ENSG00000138443.15	10152	ABI2
ENSG00000135951.14	80705	TSGA10
ENSG00000135845.9	5279	PIGC
ENSG00000104341.16	55353	LAPTM4B
ENSG00000063046.17	1975	EIF4B
ENSG00000008282.8	6856	SYPL1
ENSG00000189362.11	100131211	NEMP2
ENSG00000160145.15	8997	KALRN
ENSG00000141101.12	28987	NOB1
ENSG00000141034.9	79018	GID4
ENSG00000133112.16	7178	TPT1
ENSG00000130517.13	54858	PGPEP1
ENSG00000121742.17	10804	GJB6
ENSG00000070404.9	10272	FSTL3
ENSG00000166046.10	255394	TCP11L2
ENSG00000122224.17	4063	LY9
ENSG00000108771.12	79132	DHX58
ENSG00000005022.5	292	SLC25A5
ENSG00000188687.17	57835	SLC4A5
ENSG00000169314.14	150248	C22orf15
ENSG00000164828.17	23353	SUN1
ENSG00000157570.11	90139	TSPAN18
ENSG00000153976.2	9955	HS3ST3A1
ENSG00000115073.7	10120	ACTR1B
ENSG00000089220.4	5037	PEBP1
ENSG00000204390.9	3305	HSPA1L
ENSG00000185761.10	339366	ADAMTSL5
ENSG00000174500.12	257144	GCSAM
ENSG00000155849.15	9844	ELMO1
ENSG00000135390.18	517	ATP5MC2
ENSG00000132698.14	57111	RAB25
ENSG00000105072.8	84167	C19orf44
ENSG00000069020.18	375449	MAST4
ENSG00000036448.9	9172	MYOM2
ENSG00000179057.13	283284	IGSF22
ENSG00000165171.10	155368	METTL27
ENSG00000164867.10	4846	NOS3
ENSG00000155265.10	401647	GOLGA7B
ENSG00000148290.9	6834	SURF1
ENSG00000137331.11	8870	IER3
ENSG00000122406.13	6125	RPL5
ENSG00000117481.10	387338	NSUN4
ENSG00000174206.12	144577	C12orf66
ENSG00000169598.15	1677	DFFB
ENSG00000164008.15	79078	C1orf50
ENSG00000147044.21	8573	CASK
ENSG00000142534.6	6205	RPS11
ENSG00000137818.11	6176	RPLP1
ENSG00000137393.9	255488	RNF144B
ENSG00000136463.7	51204	TACO1
ENSG00000112530.11	135138	PACRG
ENSG00000105649.9	5864	RAB3A
ENSG00000105202.8	2091	FBL
ENSG00000100129.17	51386	EIF3L
ENSG00000158604.14	222068	TMED4
ENSG00000198755.10	4736	RPL10A
ENSG00000185760.15	56479	KCNQ5
ENSG00000182774.12	6218	RPS17
ENSG00000174748.20	6138	RPL15
ENSG00000161016.17	6132	RPL8
ENSG00000130826.17	1736	DKC1
ENSG00000103194.15	9100	USP10
ENSG00000089157.15	6175	RPLP0
ENSG00000085465.12	5016	OVGP1
ENSG00000079385.21	634	CEACAM1
ENSG00000003249.13	79007	DBNDD1
ENSG00000265972.5	10628	TXNIP
ENSG00000215883.10	606495	CYB5RL
ENSG00000176438.12	161176	SYNE3
ENSG00000173599.13	5091	PC
ENSG00000164494.11	57107	PDSS2
ENSG00000143376.13	81609	SNX27
ENSG00000087589.16	57091	CASS4
ENSG00000084092.6	84273	NOA1
ENSG00000204387.13	50854	C6orf48
ENSG00000183765.21	11200	CHEK2
ENSG00000167769.4	125981	ACER1
ENSG00000117480.15	2166	FAAH
ENSG00000104529.17	1936	EEF1D
ENSG00000049769.12	89801	PPP1R3F
ENSG00000198673.10	338811	FAM19A2
ENSG00000106617.13	51422	PRKAG2
ENSG00000099840.13	113177	IZUMO4
ENSG00000065268.10	57418	WDR18
ENSG00000183060.15	145748	LYSMD4
ENSG00000125534.9	79144	PPDPF
ENSG00000035141.7	84908	FAM136A
ENSG00000184986.10	80757	TMEM121
ENSG00000170889.13	6203	RPS9
ENSG00000147454.13	51312	SLC25A37
ENSG00000142675.17	10256	CNKSR1
ENSG00000138101.18	1838	DTNB
ENSG00000126467.10	60385	TSKS
ENSG00000100650.15	6430	SRSF5
ENSG00000174444.14	6124	RPL4
ENSG00000138134.11	57559	STAMBPL1
ENSG00000086232.12	27102	EIF2AK1
ENSG00000186222.4	55330	BLOC1S4
ENSG00000175470.19	55844	PPP2R2D
ENSG00000114739.13	93	ACVR2B
ENSG00000151240.16	22982	DIP2C
ENSG00000115268.9	6209	RPS15
ENSG00000107954.10	9148	NEURL1
ENSG00000140675.12	6524	SLC5A2
ENSG00000152207.7	57105	CYSLTR2
ENSG00000196236.12	63929	XPNPEP3
ENSG00000078081.7	27074	LAMP3
ENSG00000196220.15	9901	SRGAP3
ENSG00000175164.14	28	ABO
ENSG00000132570.14	84105	PCBD2
ENSG00000183475.12	140460	ASB7

## Sheet: Interferon_Response
ensembl_gene_id_version	entrezgene	hgnc_symbol
ENSG00000134321.11	91543	RSAD2
ENSG00000185507.20	3665	IRF7
ENSG00000157601.13	4599	MX1
ENSG00000025708.13	1890	TYMP
ENSG00000187608.9	9636	ISG15
ENSG00000133106.14	94240	EPSTI1
ENSG00000135114.12	8638	OASL
ENSG00000119917.13	3437	IFIT3
ENSG00000138496.16	83666	PARP9
ENSG00000103257.8	8140	SLC7A5
ENSG00000089127.12	4938	OAS1
ENSG00000188313.12	5359	PLSCR1
ENSG00000100453.12	3002	GZMB
ENSG00000134684.10	8565	YARS
ENSG00000115415.18	6772	STAT1
ENSG00000160932.10	4061	LY6E
ENSG00000173801.16	3728	JUP
ENSG00000153879.8	1054	CEBPG
ENSG00000059378.12	64761	PARP12
ENSG00000126709.14	2537	IFI6
ENSG00000111331.12	4940	OAS3
ENSG00000137959.15	10964	IFI44L
ENSG00000168961.16	3965	LGALS9
ENSG00000159335.15	5763	PTMS
ENSG00000185745.9	3434	IFIT1
ENSG00000002549.12	51056	LAP3
ENSG00000132274.15	10346	TRIM22
ENSG00000146858.7	92092	ZC3HAV1L
ENSG00000111328.6	8099	CDK2AP1
ENSG00000116663.10	26270	FBXO6
ENSG00000196141.13	26010	SPATS2L
ENSG00000105374.9	4818	NKG7
ENSG00000111335.12	4939	OAS2
ENSG00000124422.11	23326	USP22
ENSG00000105993.14	10049	DNAJB6
ENSG00000007237.18	8522	GAS7
ENSG00000167460.15	7171	TPM4
ENSG00000196684.12	84941	HSH2D
ENSG00000068079.7	3430	IFI35
ENSG00000143878.9	388	RHOB
ENSG00000060982.14	586	BCAT1
ENSG00000135362.13	79899	PRR5L
ENSG00000139722.6	79720	VPS37B
ENSG00000180644.7	5551	PRF1
ENSG00000173786.16	1267	CNP
ENSG00000069849.10	483	ATP1B3
ENSG00000100292.16	3162	HMOX1
ENSG00000107968.9	1326	MAP3K8
ENSG00000160710.16	103	ADAR
ENSG00000169504.14	25932	CLIC4
ENSG00000134326.11	129607	CMPK2
ENSG00000187210.13	2650	GCNT1
ENSG00000105538.9	54922	RASIP1
ENSG00000055332.17	5610	EIF2AK2
ENSG00000137965.10	10561	IFI44
