# Supplementary material for: Integrative Bulk and Single-Cell Profiling of Premanufacture T-cell Populations Reveals Factors Mediating Long-Term Persistence of CAR T-cell Therapy
Source: Oxford University Press journal article supplement (doi:10.1158/2159-8290.cd-20-1677), 2021-04-05
Supplement: 21598290cd201677-sup-255669_2_supp_7024531_qq9p92.xlsx [file 21598290cd201677-sup-255669_2_supp_7024531_qq9p92.xlsx]

## Sheet: Sheet1
	Primer Name	Sequence (5' -> 3')
Primers for 3C-qPCR	TCF7_P_F	TGGTAAGCCACGCCCAAGTC
	TCF7_P_R	TTAAAGGGCTCGCTCTTCCG
	TCF7_P_3C	GAGTAAGCGGGGTCAGGAGT
	TCF7_ER1_F	ACATGGGAAATACTCCGCTCAC
	TCF7_ER1_R	TCGCCTCTGACGGTTGACTC
	TCF7_ER1_3C	GCTCATAAATACACCCTGACCAA
	TCF7_EL1_F	GCCTCCCAAAGTGCTGGTATTA
	TCF7_EL1_R	GTGCCCACAGAAAGTCTCGAAG
	TCF7_EL1_3C	ACTTCACACCAACTGACACCG
	TCF7_EL2_F	GATAAGTGATGATTGGCTGTCCTC
	TCF7_EL2_R	AGGTAGACCCCAAAGGAAGATG
	TCF7_EL2_3C	ACTGGGGCAAACATCCTAAAC
	TCF7_EL3_F	CGGTGGGAATACTACATTTTGG
	TCF7_EL3_R	AACTTTCCATTGTTGCCTTATCTC
	TCF7_EL3_3C	TTGTCTTTACCTACGGTTTCAGAG
	TCF7_NL1_F	TGCTAACCTCTGACAATGCTCC
	TCF7_NL1_R	CCTTAGTCCCCTCACTTGTGC
	TCF7_NL1_3C	GCTCCATCTTTATAACATGAAGACC
	TCF7_NL2_F	CTGTGAGATACCTTTGAATGTCCC
	TCF7_NL2_R	CTTCGTGCTTGCTTGGATGA
	TCF7_NL2_3C	AGCATCAACCCCACTGAAATAC
	TCF7_NL3_F	AGAAAATCACTGAGGCTGGAGA
	TCF7_NL3_R	AGCCACCCTTCATGCCCT
	TCF7_NL3_3C	TTCTTCCCGGCATCAAGTCC
	TCF7_NR1_F	TCCATCCCAAGGGTCAAAGAG
	TCF7_NR1_R	AACAGGTTCCTAGAATAACACCAGC
	TCF7_NR1_3C	GCCCTAAGGTGGTGAATGGT
Primers for RT-qPCR	TCF7_RT_F	CTGGCTTCTACTCCCTGACCT
	TCF7_RT_R	ACCAGAACCTAGCATCAAGGA
	LEF1_RT_F	CCAAATATGAATAACGACCCA
	LEF1_RT_R	GAGAAAAGTGCTCGTCACTGT
	IRF7_RT_F	CCCACGCTATACCATCTACCT
	IRF7_RT_R	GATGTCGTCATAGAGGCTGTTG
	TBX21_RT_F	GAGGTGTCGGGGAAACTGAG
	TBX21_RT_R	ACAGTAAATGACAGGAATGGGAAC
	PRDM1_RT_F	AACTTCTTGTGTGGTATTGTCGG
	PRDM1_RT_R	CAGTGCTCGGTTGCTTTAGAC
	ACTB_RT_F	CATGTACGTTGCTATCCAGGC
	ACTB_RT_R	CTCCTTAATGTCACGCACGAT
